# Supplementary material for: Persistence and adherence of biologics in US patients with psoriatic arthritis: analyses from a claims database
Source: Atypon-hosted journal article supplement (doi:10.2217/cer-2019-0023), 2019-03-26
Supplement: supplmaterial.docx [file supplmaterial.docx]

**SUPPLEMENT**

*Supplemental Figure 1.* Discontinuation rate and time to discontinuation of index biologic during the 12-month follow-up period in patients with psoriatic arthritis who initiated a biologic using a treatment gap cutoff of **(A, B)** ≥ 45 days and **(C, D)** ≥ 180 days (sensitivity analysis).*


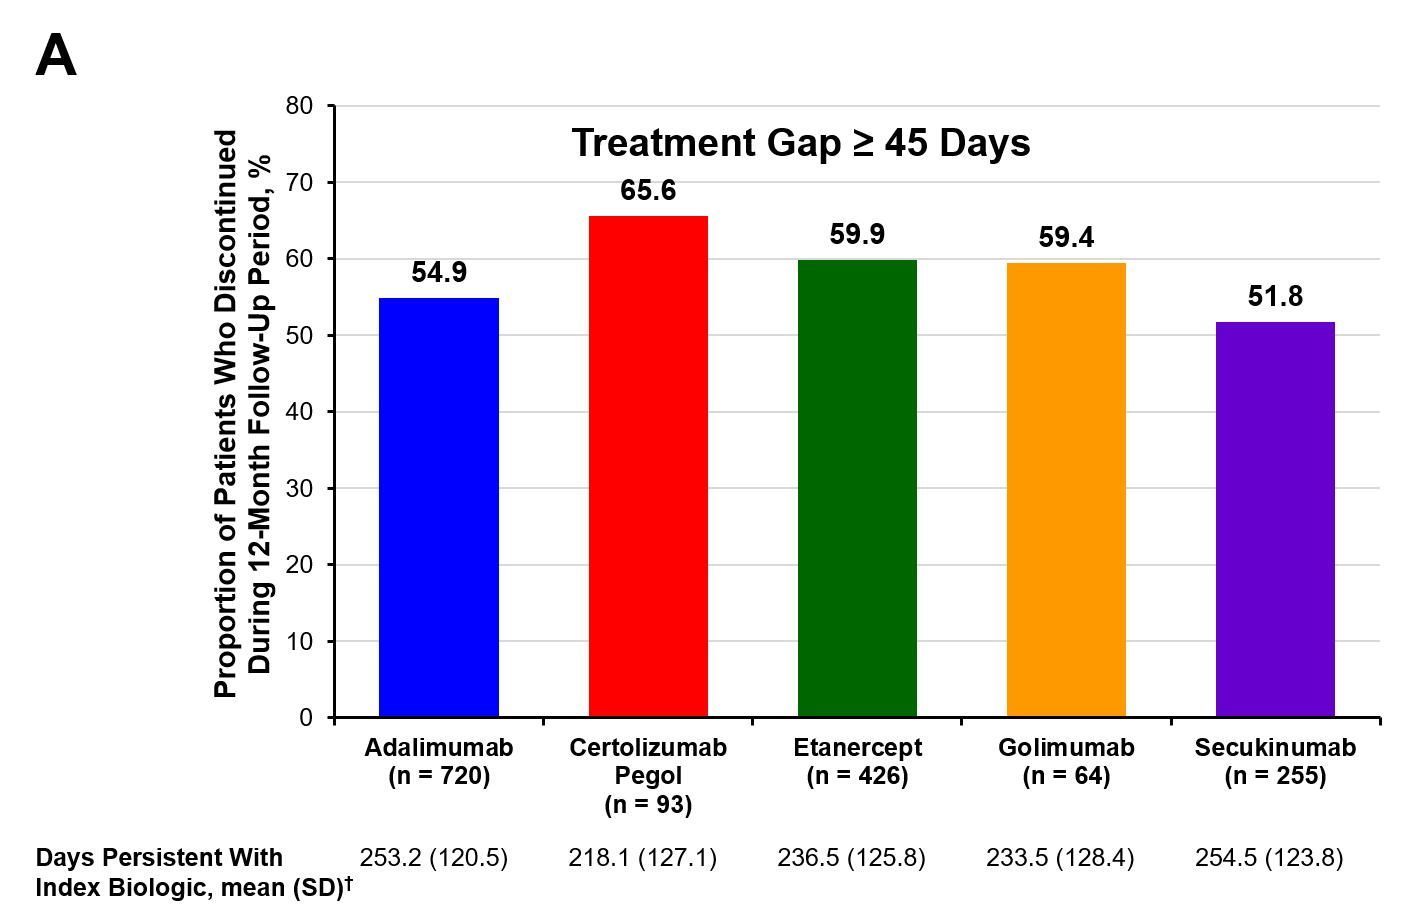

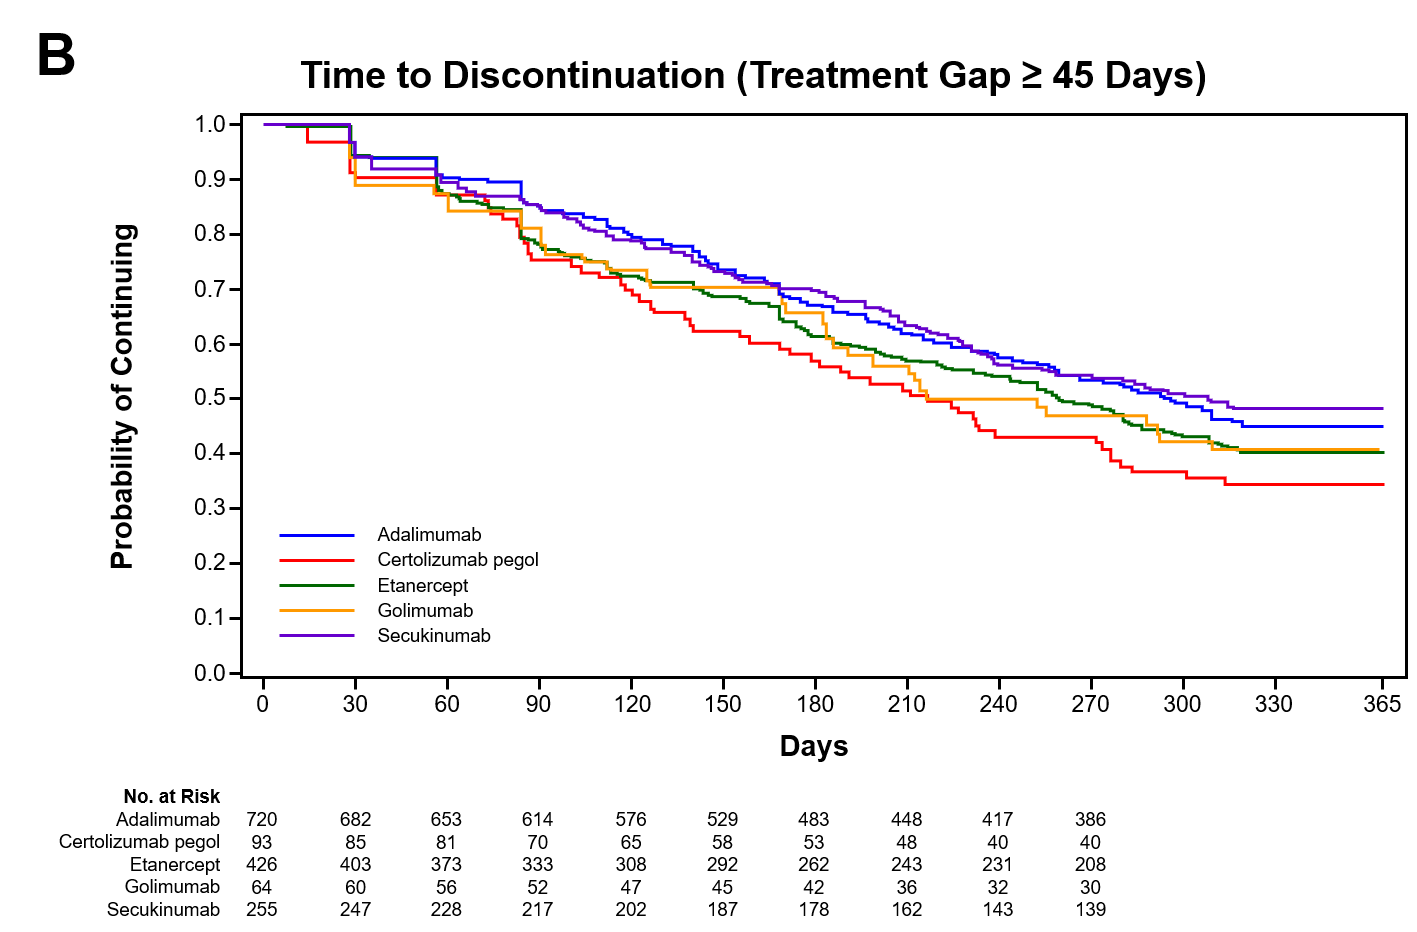

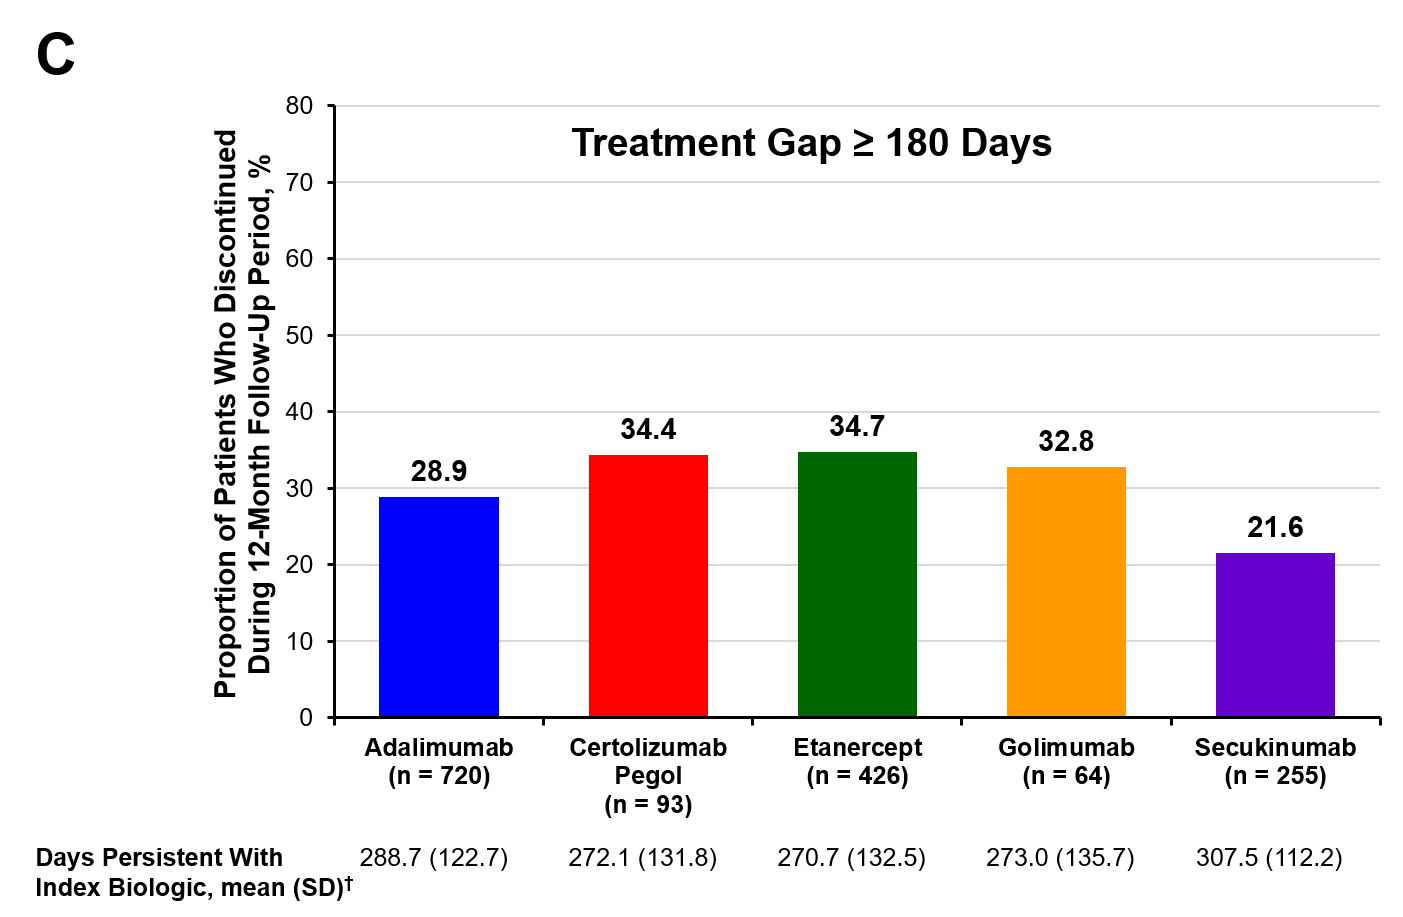

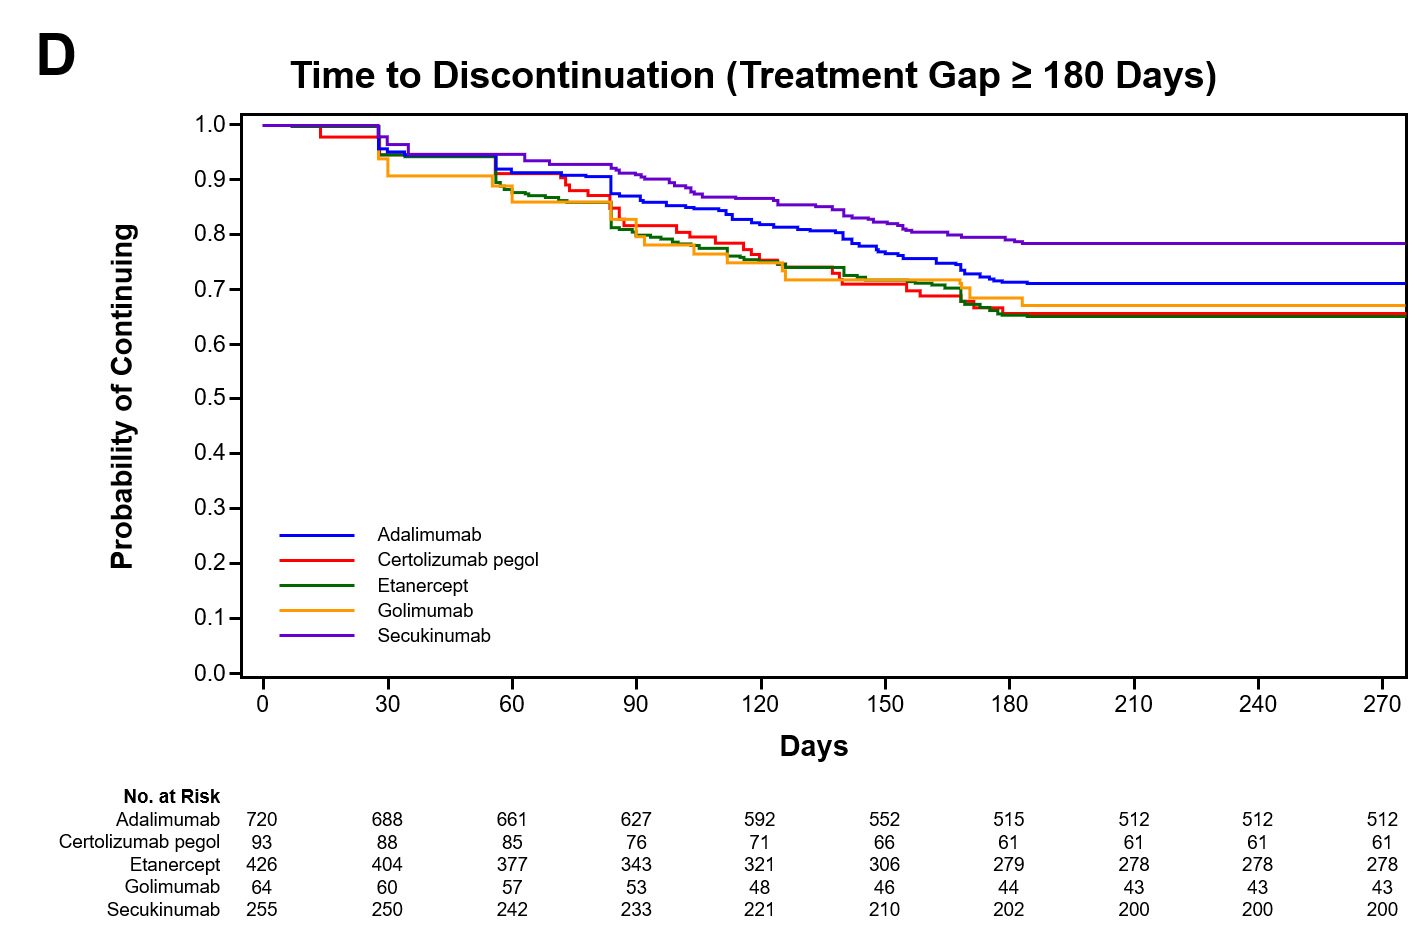


* Discontinuation was defined as no refill of the index biologic within **(A, B)** 45 days, or **(C, D)** 180 days after the previous days’ supply was exhausted. † Persistence was defined as the time from the first prescription fill of the index biologic to discontinuation of the index biologic (ie, treatment gap ≥ 45 or 180 days), or the end of follow-up if no gap was observed.
